# Supplementary material for: Plasma Bead Entrapped Liposomes as a Potential Drug Delivery System to Combat Fungal Infections
Source: MDPI journal article supplement (doi:10.3390/molecules27031105), 2022-02-07
Supplement: s1 [file s1]

Supplementary Materials

# Plasma Bead Entrapped Liposomes as a Potential Drug Delivery System to Combat Fungal Infections

Munazza Tamkeen Fatima <sup>1,\*</sup>, Zeyaul Islam <sup>2,†</sup>, Ejaj Ahmad <sup>1,§</sup>, Mehboob Hoque <sup>1</sup> and Marriam Yamin <sup>3,||</sup>

<sup>1</sup> Interdisciplinary Biotechnology Unit (IBU), Aligarh Muslim University (AMU) Aligarh, Uttar Pradesh—202002, India.

<sup>2</sup> Laboratório Nacional de Biociências (LNBio), Centro Nacional de Pesquisa em Energia e Materiais (CNPEM), Campinas, Sao Paulo, 13083-970, Brazil.

<sup>3</sup> Functional and Molecular Biology, Biochemistry, UNICAMP, Campinas, Sao Paulo, 13083-970, Brazil;

† Current address: Department of Neurosciences, Hamad Medical Corporation, Qatar.

‡ Current address: Qatar Biomedical Research Institute, Hamad Bin Khalifa University, Qatar Foundation, P.O.Box 5825 Doha, Qatar.

§ Current address: Central Molecular Laboratory, Govind Ballabh Pant Institute of Postgraduate Medical Education and Research (GIPMER), New Delhi, India. 110002

|| Current address: Applied Bio-Chemistry Lab, Department of Biosciences, Aliah University, Kolkata 700156, India

\* Correspondence: munazza.ibu@gmail.com

Table S1. Physicochemical properties of the entrapped pharmaceuticals.

| Molecules      | Molecular Weight | Solubility                       | Chemical Structure                                                                   | Use                             |
|----------------|------------------|----------------------------------|--------------------------------------------------------------------------------------|---------------------------------|
| Amphotericin B | 924.1 g/mol      | Soluble in DMSO upto 30-40 mg/ml | 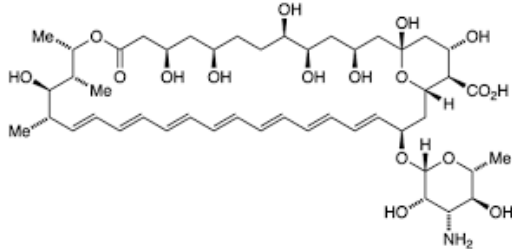   | Drug-Antifungal agent           |
| Blue dextran   | ~2000 kDa        | Soluble in water upto 50 mg/ml   |   | Molecular marker                |
| HRP            | ~44kDa           | Readily soluble in water         |  | Enzyme-Biochemical applications |
